# Supplementary material for: Quantitative assessment can stabilize indirect reciprocity under imperfect information
Source: PubMed Central journal article supplement (PMC10097696; doi:10.1038/s41467-023-37817-x), 2023-04-12
Supplement: 41467_2023_37817_MOESM1_ESM.pdf [file 41467_2023_37817_MOESM1_ESM.pdf]

# Quantitative assessment can stabilize indirect reciprocity under imperfect information

Laura Schmid<sup>1,\*</sup>, Farbod Ekbatani<sup>2</sup>, Christian Hilbe<sup>3</sup>, Krishnendu Chatterjee<sup>1</sup>

<sup>1</sup>KAIST Graduate School of AI, 02455 Seoul, South Korea

<sup>2</sup>Booth School of Business, The University of Chicago, Chicago, Illinois 60637, USA

<sup>3</sup>Max Planck Research Group Dynamics of Social Behavior, Max Planck Institute for Evolutionary Biology, 24306 Ploen, Germany

\*E-mail: laura.schmid@kaist.ac.kr

March 16, 2023

1 In the following, we present theoretical underpinnings of our main results, thus further strengthening our  
2 findings. In **Supplementary Note 1**, we analyze reputation dynamics in a homogeneous population of  
3 leading eight players using quantitative assessment that start out with a single disagreement among them.  
4 We model the dynamics as a Markov chain, and show that the expected time to recovery from a single  
5 disagreement is bounded from above by the corresponding quantity in the binary assessment model.

6 In **Supplementary Note 2**, we give a formal characterization of those social norms that are successful  
7 by using quantitative assessment under private and imperfect information. This is in analogy to previous  
8 work that gave such axioms for the case of binary assessment under public information<sup>2</sup>. With this  
9 characterization, we can explain why we have identified four leading eight norms that can maintain  
10 cooperation in the private information setting when players use more nuanced assessment.

## 11 **Supplementary Note 1: Recovery analysis**

12 We can also analyze the recovery from single disagreements when  $R = 1$ , in close analogy to previous  
13 work<sup>1</sup>. To this end, we consider a setting where observation is perfect ( $q = 1$ ) and perception errors are  
14 rare ( $\varepsilon \rightarrow 0$ ). We then assume an initial configuration where all players perceive everyone else as good  
15 with the exception of player 1, who perceives player 2 as bad, potentially due to a previous error. That  
16 is, we have an initial image matrix  $M(0)$  with entries

$$r_{ij}^0 = \begin{cases} -1 & \text{if } i = 1, j = 2 \\ 0 & \text{otherwise.} \end{cases} \quad (1)$$

17 The defining feature of this initial configuration is that with the exception of the pair  $(i, j) = (1, 2)$ ,  
18 all players assign the overall label "good" to their co-players. Alternatively, we can thus also envision an  
19 initial configuration of

$$r_{ij}^0 = \begin{cases} -1 & \text{if } i = 1, j = 2 \\ 1 & \text{otherwise.} \end{cases} \quad (2)$$

The defining feature is that with the exception of the pair  $(i, j) = (1, 2)$ , all players assign the overall label "good" (henceforth denoted  $G$ ) to their co-players.

We define as recovery of the population the return to the state where all players have a good reputation, starting from  $M(0)$ . In this context, we are now interested in two quantities, which depend on the social norm  $L_i$  applied in the population: the population's recovery probability  $\rho_i$ , and the expected time till recovery  $\tau_i$ , conditioned on recovery actually taking place.

With the following proposition, we simplify our analysis:

**Proposition 1.** *Consider the indirect reciprocity game for a population in which everyone applies the same leading-eight strategy  $L_i$  and uses quantitative assessment with  $R = 1$ , such that reputation scores can take the values  $r_{ij} = \{-1, 0, 1\}$ . Moreover, assume that the initial image matrix is  $M(0)$  as defined either by Eq.(1) or (2), and let  $M(t)$  denote the image matrix at some subsequent time  $t > 0$  according to the process with perfect observation and no noise,  $q=1$  and  $\varepsilon=0$ . Then,  $M(t) \in \mathcal{M}$ , where  $\mathcal{M}$  is the set of all image matrices that satisfy the following four conditions*

$$(i) \ r_{ii} \in \{0, 1\} \text{ for all } i, \quad (ii) \ r_{ij} = r_{i'j} \text{ for } i, i' \geq 2, j \geq 1, \quad (iii) \ r_{ij} \in \{0, 1\} \text{ for all } \{i, j\} \geq 2, \quad (3)$$

Additionally, we have that

$$(iv) \ r_{ij}^{t+1} \geq r_{ij}^t \text{ for all } i, j \geq 2, \quad (4)$$

and that

$$(v) \ r_{ii}^{t+1} \geq r_{ii}^t \text{ for all } i. \quad (5)$$

*Proof of Proposition 1.* We consider the Markov chain on the space of image matrices  $H = (h_{M,M'})$ , in the limiting case of  $\varepsilon = 0$  and  $q = 1$ . We then show that the set  $\mathcal{M}$  of image matrices that satisfy the properties (i)–(v) is invariant. That is, let  $M \in \mathcal{M}$  be arbitrary and suppose that  $h_{M,M'} > 0$  for some matrix  $M'$ . Then also  $M' = \{r'_{ij}\}$  satisfies all properties.

(i)  $r'_{ii} \in \{0, 1\}$  for all  $i$ . Since  $M \in \mathcal{M}$ , initially all players consider themselves as good, i.e.  $r_{ii}^0 \in \{0, 1\}$ . All leading-eight strategies have the property that the strategy's action rule prescribes an action that lets a good donor maintain her good reputation in her own eyes, independent of which reputation she assigns to the recipient. Thus, all players keep considering themselves as good after one interaction; either they do not need to make a decision (because they were not chosen to act as the donor), or they choose an action they themselves evaluate as good.

(ii)–(iii)  $r'_{ij} = r_{ij}$  for  $i, i' \geq 2, j \geq 1$  and  $r_{ij} \in \{0, 1\}$  for all  $i, j \geq 2$ . Since  $M \in \mathcal{M}$ , all players  $i, j \geq 2$  initially agree on the reputations of all population members. Because they all apply the same

47 assessment rule and observation errors are excluded, they also agree on how the donor's action  
 48 in the subsequent interaction needs to be assessed. This shows  $r'_{il} = r'_{jl}$  for all  $i, j \geq 1$  and all  $l$ .  
 49 Moreover, since all players  $i, j \geq 2$  consider each other as good initially, and since their common  
 50 action rule only lets them choose actions that let them keep their good reputation, we conclude  
 51  $r'_{ij} \in \{0, 1\}$  for  $i, j \geq 2$ .

52 (iv)–(v)  $r'_{ij} \geq r_{ij}$  for all  $i, j \geq 2$  and  $r'_{ii} \geq r_{ii}$  for all  $i$ . Since  $M \in \mathcal{M}$ , all players  $i \geq 2$  initially  
 53 agree on the good reputations of all population members. By (ii) and (iii), all players  $i \geq 2$  also  
 54 keep their good image of each other, and only potentially change their opinion about player 1.  
 55 Since they thus never act against their assessment of each other for any reason, their reputation  
 56 scores in each others' eyes can only increase. Hence  $r'_{ij} \geq r_{ij}$  for all  $i, j \geq 2$ . The same reasoning  
 57 applies to all self images, including that of player 1 - due to the lack of observation errors of any  
 58 kind, players never act against their own assessment rule, and can only improve their self image  
 59 over time. This shows  $r'_{ii} \geq r_{ii}$  for all  $i$ .

60 □

61 Proposition 1 guarantees that when we consider a process with private information, perfect ob-  
 62 servation, and no noise, (i) all players assign themselves a good reputation overall, (ii) all players  
 63  $2 \leq i, j \leq N$  assign each other a good reputation overall, (iii) all players  $2 \leq i, j \leq N$  assign the same  
 64 reputation to player 1, (iv) the exact reputation scores that players  $2 \leq i, j \leq N$  assign to each other at  
 65 time  $t$  can not be smaller than in the initial configuration. Furthermore, (v) and (vi) additionally imply  
 66 that the exact reputation scores that players  $2 \leq i, j \leq N$  assign to each other are nondecreasing over all  
 67 timesteps  $t$ , which means that the overall reputations among these players cannot turn into “bad”.

68 Proposition 1 also lets us reduce the state space when we consider a model of private information.  
 69 Instead of tracking entire image matrices  $M$ , we can focus on 3-tuples  $(s, k, l)$ , with  $s \in \{-1, 0, 1\}$ ,  
 70  $k \in \{0, \dots, N - 1\}$ ,  $l \in \{0, \dots, N - 1\}$  and  $0 \leq (k + l) \leq N - 1$ . We identify  $s$  as player 1's reputation  
 71 score from the perspective of all other players (due to Proposition 1(iii), all other players agree on player  
 72 1's reputation). The value of  $k$  denotes the number of players that player 1 considers to have score  
 73  $r_{1i} = 0$ , whereas  $l$  denotes the number of players that 1 considers to have score  $r_{1j} = 1$ . The sum of  $k$   
 74 and  $l$  thus corresponds to the number of players that player 1 considers to have a good reputation overall.  
 75 We can use this reduction due to Proposition 1(iii), which says that all other players can be considered  
 76 to be equivalent.

77 In this reduced state space, the Markov chain has  $\frac{3(N+1)N}{2}$  states in total. The initial states as defined  
 78 in Eqs.(1) and (2) now correspond to the 3-tuples  $(0, N - 2, 0)$  and  $(1, 0, N - 2)$ . On the other hand, we  
 79 can identify the fully recovered state as a group of configurations  $\mathcal{A}$ , with

$$\mathcal{A} = \{(x, y, z) | x \in \{0, 1\}, y + z = N - 1\} \quad (6)$$

80 We can now write down transition probabilities for  $L_i, f^i(s, k, l; s', k', l')$ , for the reduced state

81 space. They denote probabilities of the population moving from state  $(s,k,l)$  to  $(s',k',l')$  in one round.  
 82 There are at most 12 different transitions the population can take in the course of a run of the reputation  
 83 dynamics. Given the nature of the quantitative assessment dynamics we have introduced, many transition  
 84 probabilities are independent of the exact value of  $s$ ; instead, they depend on whether  $s \geq S$  with  $S$  the  
 85 threshold for overall assessment, i.e. whether player 1 has a “good” or “bad” image in the eyes of the  
 86 other players. This means that in these cases  $f^i(1, k, l; 1, k', l') = f^i(0, k, l; 0, k', l') \forall i, k, l$ , and we  
 87 write them as  $f^i(G, k, l; G, k', l')$ . In analogy, we write  $f^i(B, k, l; B, k', l')$  for  $f^i(-1, k, l; -1, k', l')$ .

88 We can calculate the transition probabilities as follows:

89 Transition  $(G, k, l) \rightarrow (G, k+1, l)$ . This case can only occur if a player  $i > 1$  is chosen to be the donor  
 90 who is perceived as bad by player 1. Given that the current state is  $(G, k, l)$ , it follows from Propo-  
 91 sition 1 that the donor considers everyone as good, and hence they cooperate. If player 1 considers  
 92 the receiver to be good, this leads them to assign a good reputation to the donor, independent  
 93 of the applied leading-eight strategy  $L_i$ . Otherwise, if player 1 considers the receiver to be bad,  
 94 the donor only obtains a good reputation for  $L_1, L_2, L_3$ , and  $L_5$ . Therefore, the corresponding  
 95 transition probability is

$$f^i(G, k, l; G, k+1, l) = \begin{cases} \frac{N-(k+l)-1}{N} & \text{if } i \in \{1, 2, 3, 5\} \\ \frac{N-(k+l)-1}{N} \frac{k+l+1}{N-1} & \text{if } i \in \{4, 6, 7, 8\}. \end{cases} \quad (7)$$

96 Transition  $(G, k, l) \rightarrow (G, k-1, l)$ . This case can only occur if a player  $i > 1$  is randomly chosen to act as  
 97 the donor who is perceived to have reputation score  $r_{1i} = 0$  by player 1. Similar to before, player  
 98  $i$  will always cooperate, which is only considered as bad by player 1 if the receiver is considered  
 99 as bad by player 1 and if the applied strategy is either  $L_2, L_5, L_6$ , or  $L_8$ . Therefore, the transition  
 100 probability is

$$f^i(G, k, l; G, k-1, l) = \begin{cases} 0 & \text{if } i \in \{1, 3, 4, 7\} \\ \frac{k}{N} \frac{N-(k+l)-1}{N-1} & \text{if } i \in \{2, 5, 6, 8\}. \end{cases} \quad (8)$$

101 Transition  $(G, k, l) \rightarrow (B, k, l)$ . This corresponds to the probability  $f^i(0, k, l; -1, k, l)$ . The transition  
 102 can only occur if player 1 is chosen to be the donor, and if player 1 defects against the receiver  
 103 (which in turn requires player 1 to consider the receiver as bad). The corresponding transition  
 104 probability is

$$f^i(0, k, l; -1, k, l) = \frac{1}{N} \frac{N - (k + l) - 1}{N - 1}. \quad (9)$$

105 Transition  $(B, k, l) \rightarrow (B, k+1, l)$ . This case requires that a player  $i > 1$  is chosen to be the donor who  
 106 is considered as bad by player 1. This donor cooperates, unless the randomly chosen receiver  
 107 happens to be player 1 (who is bad from the perspective of all other players). Thus, player 1  
 108 considers the donor as good after this round unless the receiver is player 1, or the receiver is  
 109 a group member that is considered as bad by player 1 and the applied leading-eight strategy is

110  $L_4, L_6, L_7$ , or  $L_8$ . Hence, we obtain

$$f^i(B, k, l; B, k+1, l) = \begin{cases} \frac{N-(k+l)-1}{N} \frac{N-2}{N-1} & \text{if } i \in \{1, 2, 3, 5\} \\ \frac{N-(k+l)-1}{N} \frac{(k+l)}{N-1} & \text{if } i \in \{4, 6, 7, 8\}. \end{cases} \quad (10)$$

111 Transition  $(B, k, l) \rightarrow (B, k-1, l)$ . This case requires that a player  $i > 1$  is chosen to be the donor who  
 112 player 1 considers to have reputation score  $r_{1i} = 0$ . To become bad in player 1's eyes, this donor  
 113 then either needs to defect against player 1, or he needs to cooperate against a receiver who is  
 114 considered as bad by player 1 (provided that the applied leading-eight strategy is  $L_2, L_5, L_6$ , or  
 115  $L_8$ ). The transition probability becomes

$$f^i(B, k, l; B, k-1, l) = \begin{cases} \frac{k}{N} \frac{1}{N-1} & \text{if } i \in \{1, 3, 4, 7\} \\ \frac{k}{N} \frac{N-(k+l)}{N-1} & \text{if } i \in \{2, 5, 6, 8\}. \end{cases} \quad (11)$$

116 Transition  $(B, k, l) \rightarrow (G, k, l)$ . This corresponds to the probability  $f^i(-1, k, l; 0, k, l)$ . It requires player  
 117 1 to be the donor, and that player 1 cooperates with her co-player. The probability is

$$f^i(-1, k, l; 0, k, l) = \frac{1}{N} \frac{(k+l)}{N-1}. \quad (12)$$

118 Transition  $(G, k, l) \rightarrow (G, k-1, l+1)$ . This case requires that a player  $i > 1$  is chosen to be the donor  
 119 who is considered to have reputation score  $r_{1i} = 0$  by player 1. This player cooperates with  
 120 probability 1, since they consider everyone to be good. Player 1 will increment the reputation  
 121 score of the donor unless the social norm applied is  $L_4, L_6, L_7, L_8$  and the receiver is considered  
 122 to be bad by player 1.

$$f^i(G, k, l; G, k-1, l+1) = \begin{cases} \frac{k}{N} & \text{if } i \in \{1, 3, 4, 7\} \\ \frac{k}{N} \frac{(k+l)}{N-1} & \text{if } i \in \{2, 5, 7, 8\}. \end{cases} \quad (13)$$

123 Transition  $(G, k, l) \rightarrow (G, k+1, l-1)$ . This case requires that a player  $i > 1$  is chosen to be the donor  
 124 who is considered to have reputation score  $r_{1i} = 1$  by player 1. This player cooperates with  
 125 probability 1, since they consider everyone to be good. Player 1 will decrement the reputation  
 126 score of the donor only if the social norm applied is  $L_2, L_5, L_6, L_8$  and the receiver is considered  
 127 to be bad by player 1.

$$f^i(G, k, l; G, k+1, l-1) = \begin{cases} 0 & \text{if } i \in \{1, 3, 4, 7\} \\ \frac{l}{N} \frac{N-(k+l)-1}{N-1} & \text{if } i \in \{2, 5, 6, 8\}. \end{cases} \quad (14)$$

128 Transition  $(B, k, l) \rightarrow (B, k-1, l+1)$ . This case requires that a player  $i > 1$  is chosen to be the donor  
 129 who is considered to have reputation score  $r_{1i} = 0$  by player 1. This player then has to cooperate,  
 130 which means that player 1 cannot be the receiver. Player 1 will increment the reputation score of

131 the donor unless the social norm applied is  $L_4, L_6, L_7, L_8$  and the receiver is considered to be bad  
 132 by player 1.

$$f^i(B, k, l; B, k - 1, l + 1) = \begin{cases} \frac{k}{N} \frac{N-2}{N-1} & \text{if } i \in \{1, 3, 4, 7\} \\ \frac{k}{N} \frac{(k+l)-1}{N-1} & \text{if } i \in \{2, 5, 6, 8\}. \end{cases} \quad (15)$$

133 Transition  $(B, k, l) \rightarrow (B, k + 1, l - 1)$ . This case requires that a player  $i > 1$  is chosen to be the donor  
 134 who is considered to have reputation score  $r_{1i} = 1$  by player 1. The receiver then has to be either  
 135 player 1, against who the donor will defect, or someone player 1 assigns a bad reputation to in case  
 136 the applied norm is  $L_2, L_5, L_6, L_8$ .

$$f^i(B, k, l; B, k + 1, l - 1) = \begin{cases} \frac{l}{N} \frac{1}{N-1} & \text{if } i \in \{1, 3, 4, 7\} \\ \frac{l}{N} \frac{N-(k+l)}{N-1} & \text{if } i \in \{2, 5, 6, 8\}. \end{cases} \quad (16)$$

137 Transition  $(0, k, l) \rightarrow (1, k, l)$ . This case requires player 1 to be the donor, and that player 1 cooperates  
 138 with their co-player. The probability is

$$f^i(0, k, l; 1, k, l) = \frac{1}{N} \frac{(k+l)}{N-1}. \quad (17)$$

139 It is equal to  $f^i(-1, k, l; 0, k, l)$ .

140 Transition  $(1, k, l) \rightarrow (0, k, l)$ . This case requires player 1 to be the donor, and that player 1 defects  
 141 against their co-player. The probability is

$$f^i(1, k, l; 0, k, l) = \frac{1}{N} \frac{N - (k+l) - 1}{N-1}. \quad (18)$$

142 It is equal to  $f^i(0, k, l; -1, k, l)$  in (9).

143 All other transitions from  $(s, k, l)$  to  $(s', k', l')$  have transition probability  $f^i(s, k, l; s', k', l') = 0$ .

144 We observe that for this reduced Markov chain, the set of recovery states  $\mathcal{A}$  is absorbing. As can be  
 145 verified by looking at the corresponding transition probabilities, leaving this set is impossible: for all  $i$   
 146  $f^i(G, k, l; G, k', l') = 0$  for  $k+l = N-1$  and  $k'+l' = N-2$ , as well as  $f^i(G, k, l; B, k', l') = 0$  for  
 147  $k+l = k'+l' = N-1$ . However, in the cases where one of the four social norms  $L_4, L_6, L_7, L_8$  is  
 148 employed by the population, there is another absorbing state, namely  $(-1, 0, 0)$  - a full segregation state  
 149 where player 1 considers everyone else as bad, whereas the remaining players consider player 1 to be  
 150 bad. Note that  $(G, 0, 0)$  is never an absorbing state.

151 In the following we will show that for all  $L_i$ , both the recovery probability and the expected time to  
 152 recovery are bounded from above by the corresponding quantities for the binary reputation case. In anal-  
 153 ogy to the analysis of the dynamics when reputations are binary, we first visualize the Markov chains  $M_i$   
 154 (now with quantitative assessment) for the four different cases:  $\{L1, L3\}, \{L2, L5\}, \{L4, L7\}, \{L6, L8\}$

155 **(Supplementary Figure 2– Supplementary Figure 5)**. We can then make use of a simple coupling  
 156 argument to show that these chains will perform better or equal compared to the binary assessment sce-  
 157 nario.

158 We visualize the Markov chains with quantitative assessment by first noting that the transitions of  
 159 type  $(s, k, l) \rightarrow (s, k \pm 1, l \mp 1)$  do not change the overall reputations, i.e. the labels “good” and “bad”  
 160 of any players. We can identify them with internal transitions inside the  $3N$  “aggregated” states of  
 161 type  $(s, k + l = t)$  (**Supplementary Figure 1a**), where  $t$  is the overall number of players that player  
 162 1 considers to be “good”. In our illustrations of the chains, we will omit these internal transitions for  
 163 ease of visualization (**Supplementary Figure 1b**). We note however that some of the remaining state  
 164 transitions that change the value of  $s$  or  $t$  are in fact dependent on the value of  $k$ , the number of players  
 165 that player 1 considers to have reputation score  $k = 0$ . This will become crucial when we compare our  
 166 model with the case of binary assessment.

167 First, we consider the case of  $L_1$  and  $L_3$  (**Supplementary Figure 2a**), which have found to be  
 168 most robust already in the binary case. Both have  $\mathcal{A}$  as their only set of absorbing states, and thus a  
 169 probability of  $\rho_1 = 1$  to recover from a single disagreement. When we consider the average steps to  
 170 absorption,  $\tau_1$ , we find that the lower bound is unchanged from the binary case: it assumes that we start  
 171 in state  $(1, 0, N - 2)$ . The expected time until a transition is taken that is not a self loop within the  
 172 “aggregated” state is  $\frac{1}{\frac{1}{N} + \frac{1}{N(N-1)}} = N - 1 + 1 = N - 1$ . For the upper bound, we can use a coupling  
 173 argument. We consider a simplified Markov chain  $M'_1$  where we replace the transition probabilities  
 174 depending on  $k$  with their upper bounds obtained by  $k = t, l = 0$ , and where we erase the states with  
 175  $s = 0$ . As is straightforward to check, this corresponds to the original chain of binary assessment  
 176 dynamics (**Supplementary Figure 2a**). Intuitively, our argument works by considering that all “bad”  
 177 moves (i.e., moving downwards or right in the chain) in the quantitative case always have smaller or  
 178 equal probabilities than the corresponding “bad” moves in the binary case.

179 More specifically, consider an arbitrary trace  $T$  in  $M_1$ . If  $T$  never takes a transition that changes the  
 180 value of  $s$ , we can associate the identical trace  $T'$  in  $M'_1$  that never leaves the level  $s = G$ , since the  
 181 levels  $s = 0$  and  $s = 1$  in  $M_1$  are indistinguishable in this case. Otherwise, there is a moment where  
 182  $T$  has a transition into a state with  $s' = s + 1$  or  $s' = s - 1$ . In these cases, depending on whether  $T$   
 183 is in  $s = 0$  or  $s = 1$ , the two traces either both take a step into the state where player 1 is considered  
 184 to be bad, or  $T$  remains in a state where player 1 is considered good, whereas he is considered bad in  
 185 the state that  $T'$  reaches (i.e., the middle layer ( $s = 0$ ) of  $M_1$  can act as a buffer). In both cases, we can  
 186 couple the traces such that  $T$  is never below or to the right of  $T'$ . The latter holds due to how the “lateral”  
 187 transition probabilities in the bottom layer ( $s = -1$  for  $M_1$  and  $s = B$  for  $M'_1$ ) compare. The transition  
 188 probabilities to the right  $f^{11}(B, t; B, t - 1)$  in the bottom level of  $M'_1$  are larger than the corresponding  
 189 transition probabilities  $f^1(-1, k, l; -1, k - 1, l)$  in  $M_1$ . Additionally, the transition probabilities to the  
 190 left are the same both in the bottom levels of both chains, as well as in the top level of  $M'_1$  and the  
 191 two top levels in  $M_1$ . Finally, the transition probabilities to the left in the bottom level of both chains,  
 192  $f^1(-1, k, l; -1, k + 1, l)$  and  $f^{11}(B, t; B, t + 1)$ , are always smaller than those in the upper layer(s)

193  $f^1(G, k, l; -1, k + 1, l)$  and  $f^1(G, t; G, t + 1)$ , respectively. Therefore, it follows that if  $T'$  has reached  
 194 the absorbing state  $\mathcal{A}'$  in  $n$  steps,  $T$  has reached it in  $n$  steps with at least the same probability. Thus, we  
 195 get an upper bound for the number of steps required to reach the absorbing set of states  $\mathcal{A}$  in  $M_1$ , which  
 196 is equivalent to the bound calculated for the chain in the binary assessment scenario. Since this bound  
 197 was found to be  $\tau'_1 = N + 7$ , and the lower bound is  $\tau = N - 1$ , we also find that the tight bound of  
 198  $\tau_1 = \Theta(N)$  holds in the quantitative assessment case.

199 We can use similar coupling arguments as we look at the remaining cases as well. We proceed with  
 200 the case of  $L_2$  and  $L_5$  (**Supplementary Figure 3a**), which differs from the previous chain in the positive  
 201 probability to make a step to the right in an upper level of the chain ( $f^2(G, k, l; G, k - 1, l) > 0$ ). Here,  
 202 the recovery probability is again  $\rho_2 = 1$ . For the upper bound, we can again look at the Markov chain  
 203  $M'_2$ , which is equivalent to the chain of binary assessment for  $L_2$  and  $L_5$ . Following the same arguments  
 204 as before, we can see that the upper bound on the recovery time again corresponds to the upper bound  
 205 of the recovery time in the binary case (**Supplementary Figure 3b**), with  $\tau_2 \leq \tau'_2$  and  $\tau'_2$  of order  
 206  $\Theta(N \log N)$ . If we again consider two arbitrary traces  $T$  and  $T'$ ,  $T'$  can not be in a state with a higher  
 207 value of  $s$  than  $T$  (it cannot be “above”  $T$ ) given that one step downwards is always more detrimental in  
 208  $M'_2$ . Also,  $T'$  cannot be left to  $T$ , as the probabilities to move right (i.e. away from the absorbing state)  
 209 are larger in  $M'_2$  than in  $M_2$ , and are additionally smaller in the upper level(s) of the chain than in the  
 210 lower level.

211 For the remaining cases of  $\{L_4, L_7\}$  (**Supplementary Figure 4**) and  $\{L_6, L_8\}$  (**Supplementary**  
 212 **Figure 5**), we note that we have a second absorbing state that corresponds to a full segregation state:  
 213  $(-1, 0, 0)$ . In this state, all other players regard player 1 as bad, whereas player 1 themselves regards  
 214 all other players as bad. Thus, there is a positive probability of not reaching the set  $\mathcal{A}$ . However, since  
 215 the binary assessment chains  $M'_4$  and  $M'_6$  again feature higher probabilities of “bad” moves as defined  
 216 above, we can still use the same coupling argument as in the two cases before. Both the recovery  
 217 probability and expected time to recovery of the quantitative chain  $M_4$  (**Supplementary Figure 4**) are  
 218 bounded by the corresponding properties in  $M'_4$  by way of  $\rho_4 \geq \rho'_4 \geq 1 - 2/(N - 1)!$  and  $\tau_4 \leq \tau'_4 \leq$   
 219  $2(N - 1) \cdot (e - 1) + o(1)$ . The lower bound for  $\tau_4$  remains the same as in the binary case and is identical  
 220 to the lower bound in the first case, with  $\tau_4 \leq N - 1$ , such that we again get  $\tau_4 = \Theta(N)$ .

221 The same reasoning holds for  $M_6$  (**Supplementary Figure 5**), which differs from  $M_4$  again in the  
 222 positive probability to make a step to the right in an upper level of the chain ( $f^6(G, k, l; G, k - 1, l) > 0$ ).  
 223 We get, by comparing with the bounds for the binary case, that  $\rho_6 \geq 1 - \frac{1}{N}$  and  $\tau_6 \leq N \cdot H_N - N$ , with  
 224  $H_N$  the  $N$ -th harmonic number  $\sum_{n=1}^N \frac{1}{n}$ .

225 These are very rough upper bounds. In fact, when we take a look at the actual recovery times of the  
 226 system, we find that in all eight cases,  $\tau = O(n)$ , i.e. that recovery time is approximately linear for all  
 227 leading eight norms. We show the resulting plot in **Figure S3a**. When we do linear regression on these  
 228 curves,  $\tau_i \approx N$  for  $i \in \{1, 3, 4, 7\}$  and  $\tau_i \approx 1.3N$  for  $i \in \{2, 5, 6, 8\}$ . This is a substantial improvement  
 229 over the recovery times for the case of binary reputations. We additionally find that the expected number  
 230 of defections until recovery goes towards zero as the population becomes large: a single perception error



231 typically triggers no further defection (**Figure S3b**). We note that these results are obtained when the  
 232 population starts in the state  $(0, N - 2, 0)$ , i.e. the state where all entries of the starting image matrix are  
 233 zero except for one negative entry. This corresponds to the starting state of our simulations in the main  
 234 text. Alternatively, if we let our system start in the state  $(1, 0, N - 2)$ , recovery occurs at  $\tau \approx N$  for all  
 235 leading eight strategies, including  $L_2, L_5, L_6, L_8$ .

## 236 **Supplementary Note 2: Characterization of successful strategies**

237 In analogy to the work of Ohtsuki and Iwasa<sup>2</sup>, we now explain the characteristics of those third-order  
 238 strategies that are successful both under public information as well as private and noisy information. For  
 239 this axiomatic approach, we now assume that players use quantitative assessment, since binary assess-  
 240 ment does not lead to the evolution of cooperation once information is not public.

241 In the following, we use notation similar to previous work, adapted to our model of quantitative as-  
 242 sessment. We again distinguish between reputation scores  $r_{ij} \in [-R, R]$ , and the corresponding overall  
 243 judgments (labels) as “good” or “bad”, which arise from comparing these scores with the threshold  $S$ .  
 244 The assessment (i.e. adding or subtracting from the score) of an action  $X$  by a donor with label  $A$  to-  
 245 wards a recipient with label  $B$  according to the social norm is denoted by  $d(AB, X) \in \{-1, +1\}$ . The  
 246 action (i.e. to cooperate or to defect) prescribed by the social norm for a donor with overall label  $A$  and  
 247 a recipient with label  $B$  is denoted as  $p(AB) \in \{C, D\}$ .

248 In the public information scenario, Ohtsuki and Iwasa identified the following four properties that a  
 249 third order strategy needs to fulfill to be successful in letting cooperation evolve.

250 1. Maintenance of cooperation. Assuming that a high reputation leads to a benefit that is higher than  
 251 the cost of help, most players should cooperate with each other for a norm to be successful. This  
 252 requires

$$p(GG) = C \text{ and } d(GG, C) = +1 \quad (19)$$

253 2. Identification of defectors. Players using the social norm need to be able to identify defectors. An  
 254 *ALLD* player should not get the chance to improve their reputation, and should instead be labeled  
 255 as “bad” as soon as possible. Thus, the following condition that decreases the reputation score of  
 256 a player who defects against a good opponent must hold:

$$d(GG, D) = -1 \text{ and } d(BG, D) = -1 \quad (20)$$

257 3. Justified punishment. A player who defects against an opponent judged as bad should refuse  
 258 cooperation, and not be punished for it themselves. This means

$$p(GB) = D \text{ and } d(GB, D) = +1 \quad (21)$$

259 4. Apology and forgiveness. A player who erroneously defected against an opponent should be able

260 to regain their lost reputation once they demonstrate their goodwill by cooperating with a good  
261 opponent. This gives

$$p(BG) = C \text{ and } d(BG, C) = +1 \quad (22)$$

262 We note that these four required properties are independent of whether players use binary or quan-  
263 titative assessment. These conditions fix five elements (bits) of a successful norm's assessment rule. In  
264 Ohtsuki and Iwasa's original work, three bits were then left unspecified, giving the leading eight. How-  
265 ever, if we consider the setting where information is private and noisy, we need to specify one more bit  
266 with the following condition:

267 5. Suspicion. To be successful under private and noisy information, norms need to be less gullible  
268 than in the case of public information, and need to be more suspicious of known defectors. In  
269 particular, they cannot allow defectors to gain an improved reputation score when they defect  
270 against another defector, since this would allow *ALLD* to invade. Rather, repeated defectors  
271 should continuously lose reputation. This requires

$$d(BB, D) = -1 \quad (23)$$

272 With these requirements, four of the leading eight norms remain:  $L_1, L_2, L_7, L_8$ . They are exactly  
273 the four norms that we see being able to evolve under private and noisy information, as long as they use  
274 quantitative assessment. The norms  $L_3, L_4, L_5, L_6$  in contrast are more gullible, and let defectors regain  
275 some of their reputation by defecting against another of their kind.

276 We note however that among the successful norms,  $L_8$  has the fewest opportunities for a player  
277 labeled as bad to improve his score and be labeled good (**Fig. 1a**). For example, an unconditional  
278 cooperator easily gets a bad label in the eyes of an  $L_8$  player. This explains why we see the lowest  
279 abundance and cooperation rate in equilibrium in  $L_8$  out of all four successful norms, and why the  
280 success of  $L_8$  is also more sensitive to an increased number of reputation ranks (**Fig. 5**).

## 281 **Supplementary References**

282 [1] Hilbe C, Schmid L, Tkadlec J, Chatterjee K, Nowak MA. Indirect reciprocity with private, noisy, and  
283 incomplete information. *Proceedings of the National Academy of Sciences USA*. 2018;115:12241–  
284 12246.

285 [2] Ohtsuki H, Iwasa Y. The leading eight: Social norms that can maintain cooperation by indirect  
286 reciprocity. *Journal of Theoretical Biology*. 2006;239:435–444.

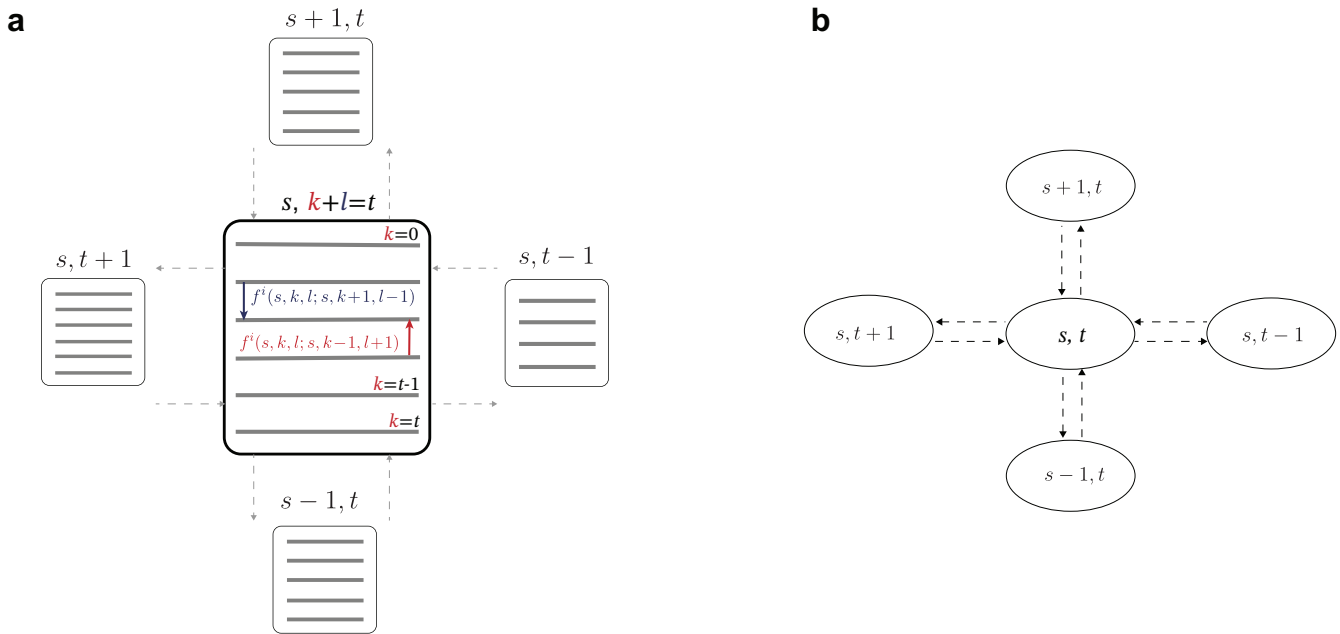

**Supplementary Figure 1: The states of the reduced Markov chains modeling assessment dynamics.** **a**, Aggregated states of the type  $(s, k + l)$ , with  $s$  the assessment of player 1 in the eyes of the other players, and  $k + l$  the number of players that player 1 assesses as good. They aggregate states  $(s, k', l')$  with  $k' + l' = k + l$ , with internal (“hidden”) transitions that change the value of  $k$  and  $l$  while keeping their sum constant. **b**, For ease of visualization, we only show the aggregated states and omit the internal states when we illustrate the Markov chains in the following. Note however that the internal state can determine the transitions out of a state.

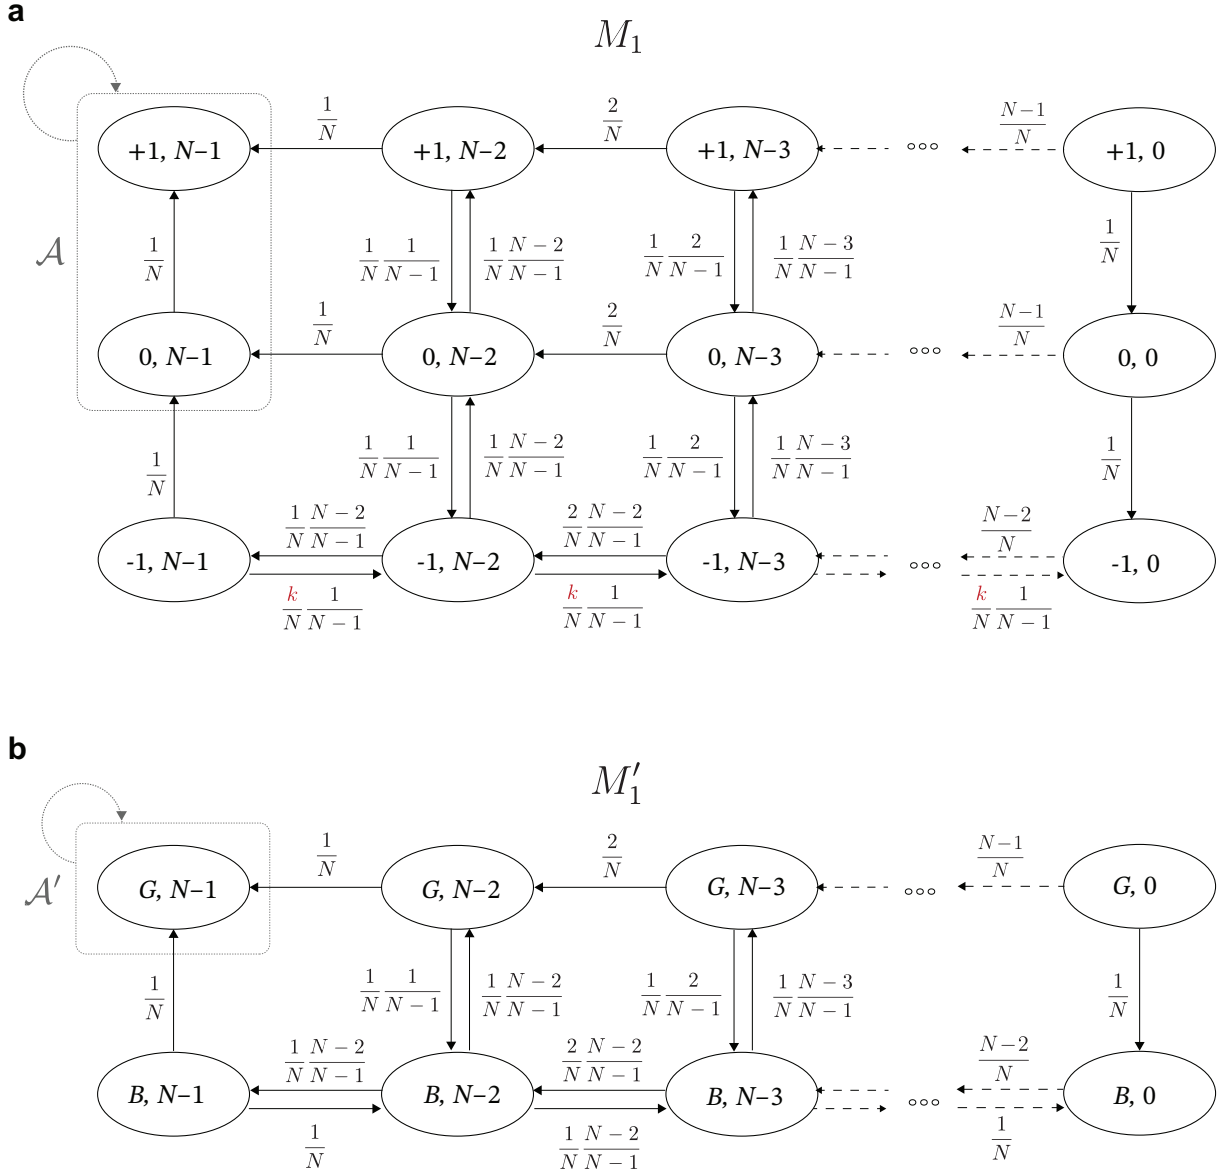

**Supplementary Figure 2: Markov chain modeling the dynamics of  $L_1$  and  $L_3$  for recovery.** **a**, The full Markov chain  $M_1$  has three “levels” corresponding to the three different values that  $s$  can take. **b**, For the upper bound, we consider a chain where states with  $s = 0$  are erased and transition probabilities to the right that are proportional to  $k$  are upper bounded by  $k + l$ . This is equivalent to the chain for the binary assessment case,  $M'_1$ .

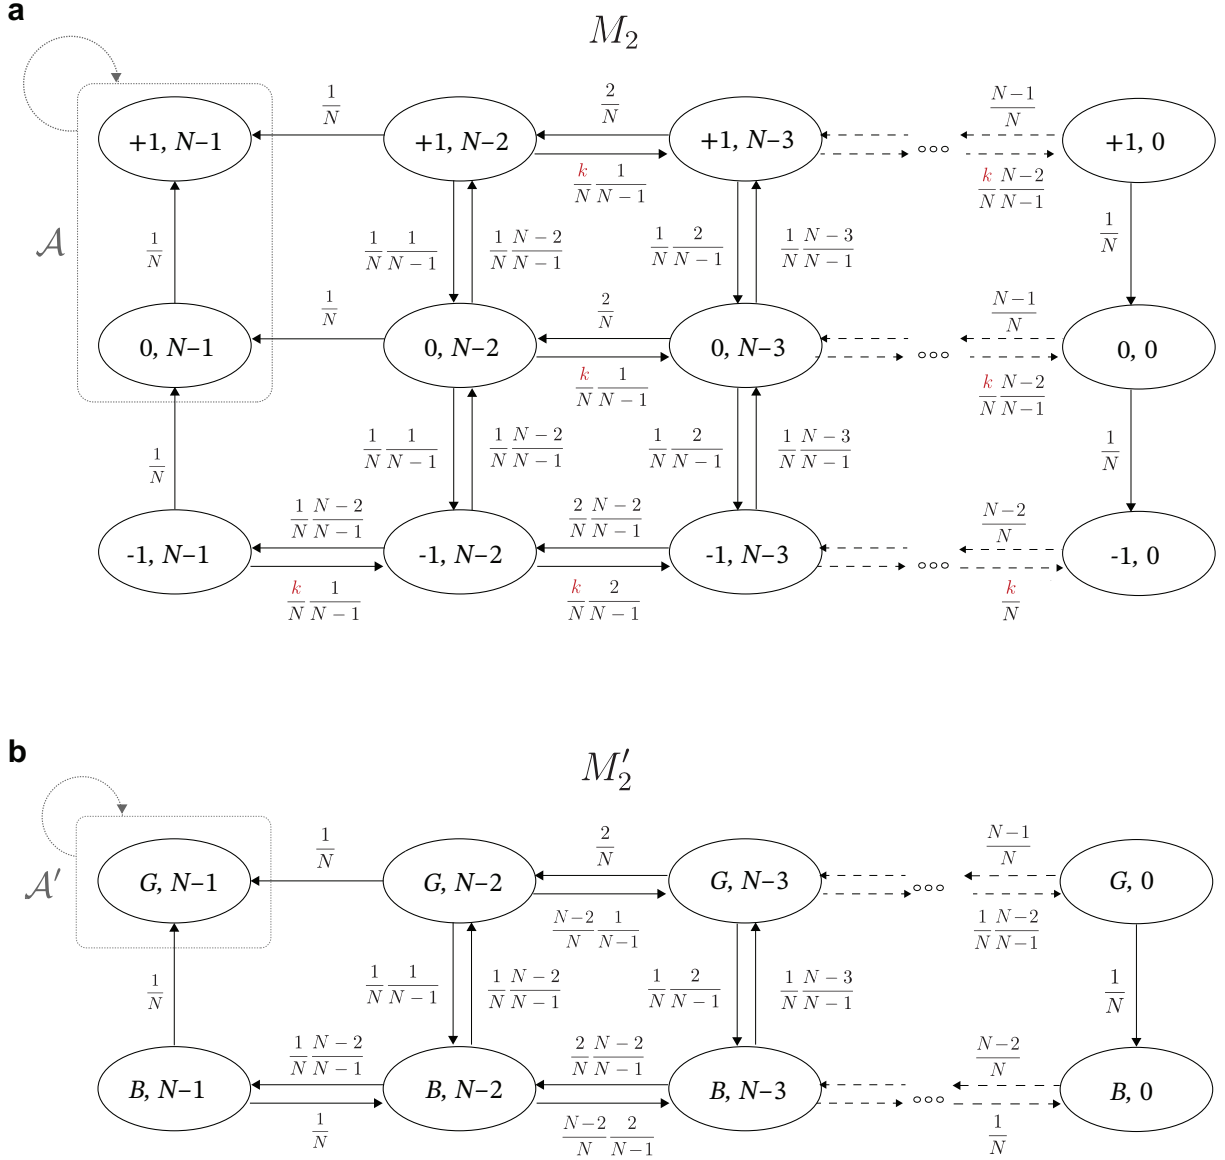

**Supplementary Figure 3: Markov chain modeling the dynamics of  $L_2$  and  $L_5$  for recovery. a,** The full Markov chain  $M_2$  has three “levels” corresponding to the three different values that  $s$  can take. **b,** For the upper bound, we again consider a chain where states with  $s = 0$  are erased and transition probabilities to the right that are proportional to  $k$  are upper bounded by  $k + l$ . This is equivalent to the chain for the binary assessment case,  $M'_2$ .

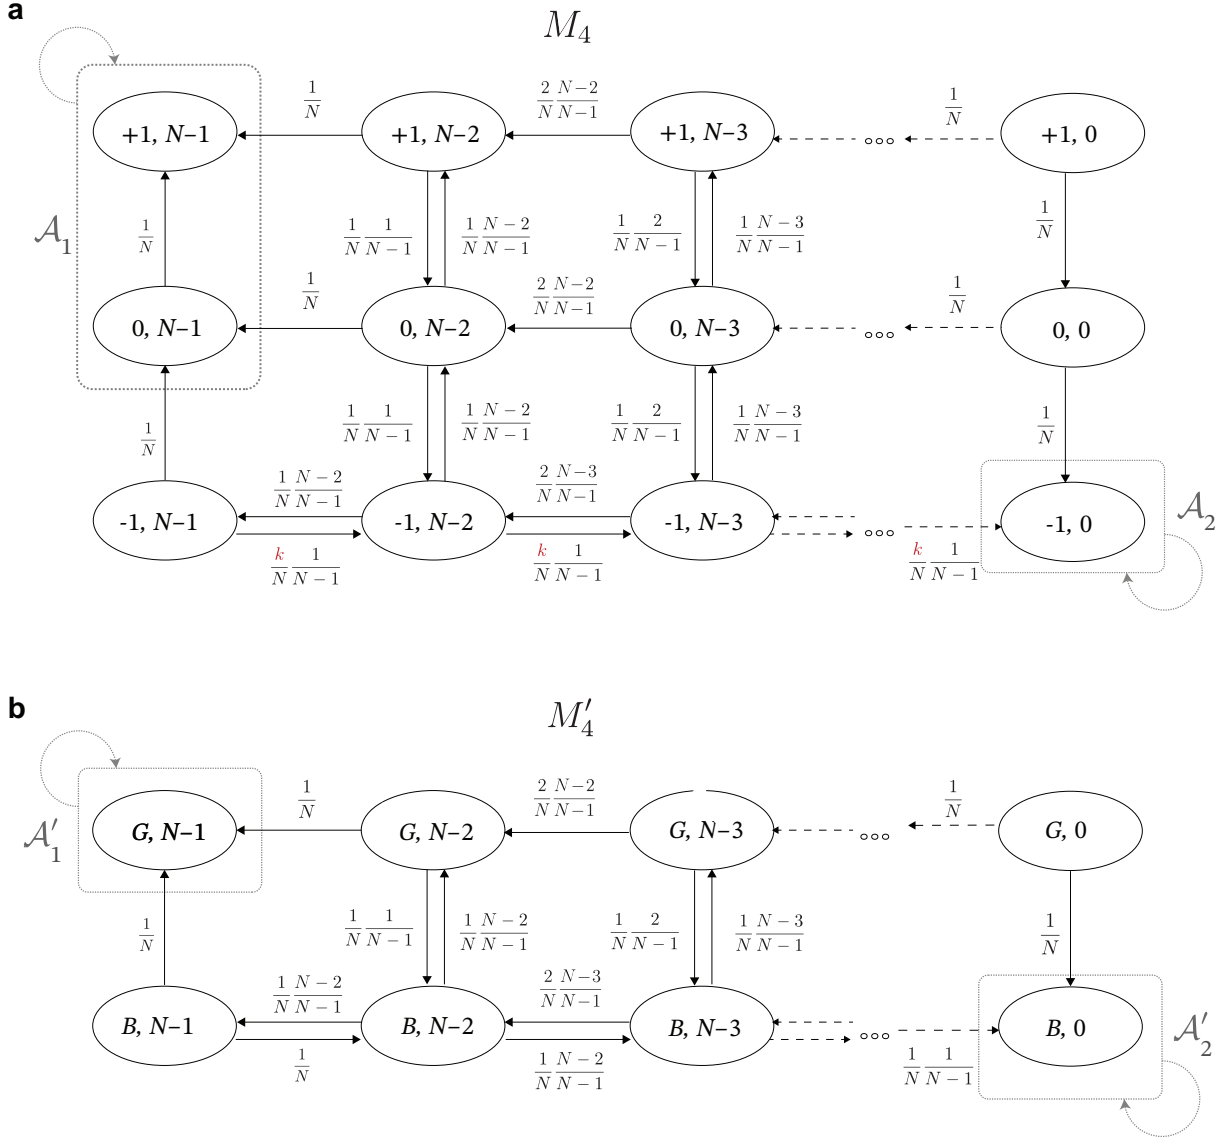

**Supplementary Figure 4: Markov chain modeling the dynamics of  $L_4$  and  $L_7$  for recovery. a**, The full Markov chain  $M_4$  has three “levels” corresponding to the three different values that  $s$  can take. **b**, For the upper bound, we consider a chain where states with  $s = 0$  are erased and transition probabilities to the right that are proportional to  $k$  are upper bounded by  $k + l$ . This is equivalent to the chain for the binary assessment case,  $M'_4$ .

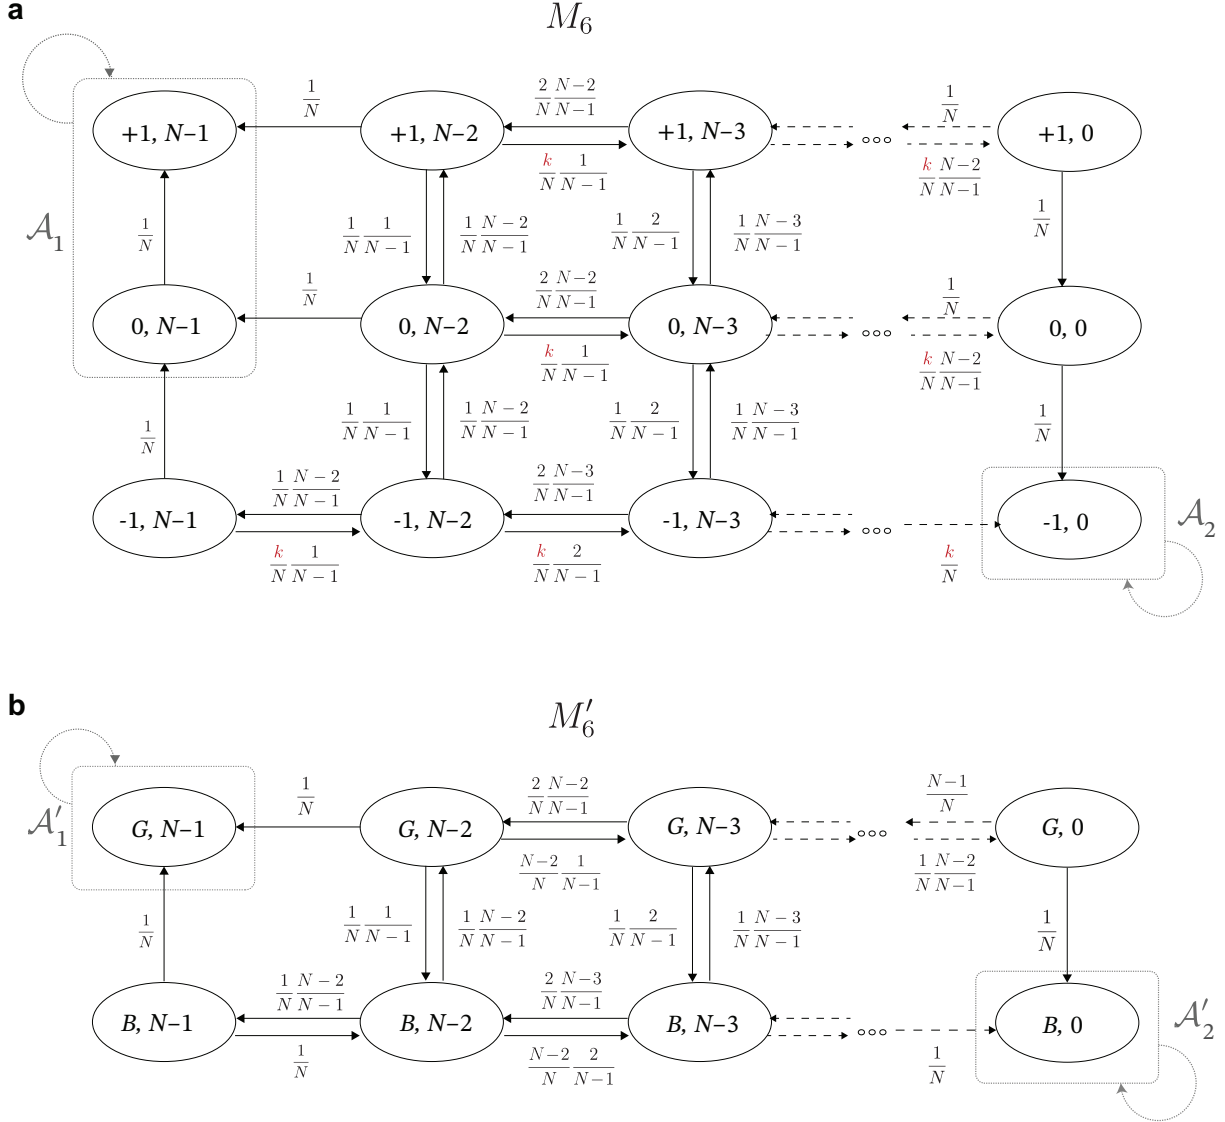

**Supplementary Figure 5: Markov chain modeling the dynamics of  $L_6$  and  $L_8$  for recovery. a,** The full Markov chain  $M_6$  has three “levels” corresponding to the three different values that  $s$  can take. **b,** For the upper bound, we consider a chain where states with  $s = 0$  are erased and transition probabilities to the right that are proportional to  $k$  are upper bounded by  $k + 1$ . This is equivalent to the chain for the binary assessment case,  $M'_6$ .
